# Supplementary material for: Risk assessment of workers’ exposure to BTEX and hazardous area classification at gasoline stations
Source: PubMed Central journal article supplement (PMC8049477; doi:10.1371/journal.pone.0249913), 2021-04-15
Supplement: pone.0249913.s001.pdf [file pone.0249913.s001.pdf]

Gasoline station survey form

## “Hazardous area classification of the gasoline stations in Thailand”

## Part 1 - Characteristics of gasoline stations

## Part 2 – Questions specific to gasoline worker’s characteristics

| Part 1. Characteristics of gasoline stations |                                                                      |                                                                                                                                                                                        |                                                                                                               |
|----------------------------------------------|----------------------------------------------------------------------|----------------------------------------------------------------------------------------------------------------------------------------------------------------------------------------|---------------------------------------------------------------------------------------------------------------|
| Item                                         | Question                                                             | Guidance choices                                                                                                                                                                       | For researcher                                                                                                |
| 1                                            | Type of retail petroleum station by Energy Ministry classification   | Type A. .... 1<br>Type B. .... 2                                                                                                                                                       | Type [ ]                                                                                                      |
| 2                                            | How many years has it been open for service?                         | number .....year<br>since .....                                                                                                                                                        | service [ ]                                                                                                   |
| 3                                            | What is the daily operation time of the station?                     | .....1. 06.00 – 22.00 hr.<br>.....2. 24 hr.<br>.....3. Other                                                                                                                           | Operatetime [ ]                                                                                               |
| 4                                            | How many gasoline workers are there?                                 | amount .....persons                                                                                                                                                                    | Employees [ ]                                                                                                 |
| 5                                            | How many shiftwork per day are there on the service?                 | amount ..... shift                                                                                                                                                                     | Shift [ ]                                                                                                     |
| 6                                            | How many workers are there on each shiftwork?                        | amount ..... workers/shift                                                                                                                                                             | Shiftstaff [ ]                                                                                                |
| 7                                            | How many fuel dispensers are there?                                  | amount ..... dispenser                                                                                                                                                                 | dispenser [ ]                                                                                                 |
| 8                                            | How many nozzles per fuel type are there; please identify.           | Benzine ..... nozzles<br>gasohol 95 ..... nozzles<br>gasohol 91 ..... nozzles<br>gasohol E20 ..... nozzles<br>gasohol E85 ..... nozzles<br>Diesel ..... nozzles<br>Other ..... nozzles | Ben_noz [ ]<br>Gas95_noz [ ]<br>Gas91_noz [ ]<br>Gas20_noz [ ]<br>E85_noz [ ]<br>Des_noz [ ]<br>Other_noz [ ] |
| 9                                            | Has a vapor recovery system (VRS) been installed on the fuel nozzle? | No .....0 (move to item 11)<br>Yes ..... 1                                                                                                                                             | VRS [ ]                                                                                                       |
| 10                                           | How many VRS nozzles are there?                                      | amount ..... nozzles                                                                                                                                                                   | VRS_num [ ]                                                                                                   |
| 11                                           | How many liters of gasoline are sold daily in total?                 | amount ..... liters                                                                                                                                                                    | sold_vol [ ]                                                                                                  |
| 12                                           | How many liters of each gasoline type are sold daily?                | benzene ..... liters<br>gasohol 95 ..... liters<br>gasohol 91 ..... liters<br>gasohol E20 ..... liters<br>gasohol E85 ..... liters<br>Diesel ..... liters<br>Other ..... liters        | Ben_vol [ ]<br>Gas95_vol [ ]<br>Gas91_vol [ ]<br>Gas20_vol [ ]<br>E85_vol [ ]<br>Des_vol [ ]<br>Other_vol [ ] |

|                                                                          |                                                                                                                                                                                                                                                                                                                                                                                               |                                                                              |               |
|--------------------------------------------------------------------------|-----------------------------------------------------------------------------------------------------------------------------------------------------------------------------------------------------------------------------------------------------------------------------------------------------------------------------------------------------------------------------------------------|------------------------------------------------------------------------------|---------------|
| 13                                                                       | What is the safety distance of the following in meters?;<br>- safety distance setback from the main road                                                                                                                                                                                                                                                                                      | .... 1. < 5 meters<br>.....2. ≥ 5 meters                                     | stbacrod [ ]  |
| 14                                                                       | - safety distance between the fuel storage tank and service building                                                                                                                                                                                                                                                                                                                          | ..... 1. < 5 meters<br>..... 2. ≥ 5 meters                                   | sttakbud [ ]  |
| 15                                                                       | - safety distance between the fuel storage tank and fuel dispenser                                                                                                                                                                                                                                                                                                                            | ..... 1. < 5 meters<br>..... 2. ≥ 5 meters                                   | sttakdisp [ ] |
| 16                                                                       | - safety distance between each fuel dispenser                                                                                                                                                                                                                                                                                                                                                 | ..... 1. < 5 meters<br>.....2. ≥ 5 meters                                    | stdisp2 [ ]   |
| 17                                                                       | - safety distance between fuel dispensers and the service building                                                                                                                                                                                                                                                                                                                            | .....1. < 5 meters<br>.....2. ≥ 5 meters                                     | stdispbud [ ] |
| 18                                                                       | Service type classification:<br>Type IV; fuel dispenser house, oil storage tanks, office, maintenance store minimart, coffee shop, food court<br>Type III; fuel dispenser house, oil storage tanks, office, maintenance store minimart, coffee shop<br>Type II; fuel dispenser house, oil storage tanks, office, maintenance store<br>Type I; fuel dispenser house, oil storage tanks, office | ..... 1. Type I<br>..... 2. Type II<br>..... 3. Type III<br>..... 4. Type IV | service [ ]   |
| <b>Part 2: Questions specific to a gasoline worker's characteristics</b> |                                                                                                                                                                                                                                                                                                                                                                                               |                                                                              |               |
| 19                                                                       | Age                                                                                                                                                                                                                                                                                                                                                                                           | .....years.....month                                                         | Age [ ]       |
| 20                                                                       | What is your main service function at the gasoline station?                                                                                                                                                                                                                                                                                                                                   | .....1. Refueling service<br>.....2. Cashier                                 | function [ ]  |
| 21                                                                       | How many years of experience do you have working at the gasoline station                                                                                                                                                                                                                                                                                                                      | ..... years<br>.....months                                                   | exper [ ]     |
| 22                                                                       | How many days per week do you usually work at the station?                                                                                                                                                                                                                                                                                                                                    | .....days/week                                                               | day [ ]       |
| 23                                                                       | How many hours per day do you usually work at the station?                                                                                                                                                                                                                                                                                                                                    | ..... hours/day                                                              | hours [ ]     |
