# Supplementary material for: Risk assessment of workers’ exposure to BTEX and hazardous area classification at gasoline stations
Source: PubMed Central journal article supplement (PMC8049477; doi:10.1371/journal.pone.0249913), 2021-04-15
Supplement: pone.0249913.s002.pdf [file pone.0249913.s002.pdf]

**แบบสำรวจสถานีบริการจำหน่ายน้ำมันเชื้อเพลิง**  
**“การจำแนกพื้นที่อันตรายของสถานีบริการจำหน่ายน้ำมันเชื้อเพลิงในประเทศไทย”**

ข้อมูลประกอบด้วย 2 ส่วน

ส่วนที่ 1 ข้อมูลทั่วไปของสถานีบริการน้ำมันเชื้อเพลิง

ส่วนที่ 2 ข้อมูลของพนักงานสถานีบริการน้ำมันเชื้อเพลิง

| ส่วนที่ 1 ข้อมูลทั่วไปของสถานีบริการน้ำมันเชื้อเพลิง |                                                                                    |                                                                                                                                                                             |                                                                                                               |
|------------------------------------------------------|------------------------------------------------------------------------------------|-----------------------------------------------------------------------------------------------------------------------------------------------------------------------------|---------------------------------------------------------------------------------------------------------------|
| ข้อที่                                               | คำถาม                                                                              | แนวทางตัวเลือก / คำตอบ                                                                                                                                                      | สำหรับผู้วิจัย                                                                                                |
| 1                                                    | ประเภทสถานีบริการน้ำมันเชื้อเพลิง จำแนกตามประกาศของกระทรวงพลังงาน                  | .....1. ประเภท ก.<br>.....2. ประเภท ข.                                                                                                                                      | Type [ ]                                                                                                      |
| 2                                                    | ปัจจุบันสถานีบริการฯ เปิดบริการมากี่ปี                                             | จำนวน ..... ปี<br>เปิดตั้งแต่ปี .....                                                                                                                                       | service [ ]                                                                                                   |
| 3                                                    | สถานีบริการฯ เปิดให้บริการเวลาใด                                                   | ..... 1. 06.00 – 22.00 น.<br>.....2. 24 ชม.<br>..... 3. อื่นๆ                                                                                                               | Operatetime [ ]                                                                                               |
| 4                                                    | ปัจจุบันมีจำนวนพนักงานเท่าไร                                                       | จำนวน ..... คน                                                                                                                                                              | Employees [ ]                                                                                                 |
| 5                                                    | สถานีบริการฯ ทำงานกี่กะ                                                            | จำนวน ..... กะ                                                                                                                                                              | Shift [ ]                                                                                                     |
| 6                                                    | สถานีบริการฯ ทำงานกะละกี่คน                                                        | จำนวน ..... คนต่อกะ                                                                                                                                                         | Shiftstaff [ ]                                                                                                |
| 7                                                    | สถานีบริการฯ มีหัวจ่ายน้ำมันเชื้อเพลิงเท่าไร                                       | จำนวน ..... หัวจ่าย                                                                                                                                                         | dispenser [ ]                                                                                                 |
| 8                                                    | จำนวนหัวจ่ายน้ำมันเชื้อเพลิงแต่ละชนิดในสถานีบริการฯ                                | เบนซิน ..... หัวจ่าย<br>โซฮอลล์ 95..... หัวจ่าย<br>โซฮอลล์ 91..... หัวจ่าย<br>โซฮอลล์ E20 .....หัวจ่าย<br>E 85 ..... หัวจ่าย<br>ดีเซล .....หัวจ่าย<br>อื่นๆ .....หัวจ่าย    | Ben_noz [ ]<br>Gas95_noz [ ]<br>Gas91_noz [ ]<br>Gas20_noz [ ]<br>E85_noz [ ]<br>Des_noz [ ]<br>Other_noz [ ] |
| 9                                                    | สถานีบริการฯ ระบบหัวจ่ายน้ำมันเชื้อเพลิงแบบระบบดูดไอน้ำมันกลับ (VRS) หรือไม่       | .....0. ไม่มี (ข้ามไปข้อ 11)<br>.....1. มี                                                                                                                                  | VRS [ ]                                                                                                       |
| 10                                                   | จำนวนหัวจ่ายน้ำมันเชื้อเพลิงแบบระบบดูดไอน้ำมันกลับ (VRS)                           | จำนวน.....หัวจ่าย                                                                                                                                                           | VRS_num [ ]                                                                                                   |
| 11                                                   | ปริมาณยอดขายน้ำมันเชื้อเพลิงต่อวัน (หน่วยเป็นลิตร)                                 | จำนวน .....ลิตร                                                                                                                                                             | sold_vol [ ]                                                                                                  |
| 12                                                   | ปริมาณยอดขายน้ำมันเชื้อเพลิงแยกตามชนิดของน้ำมันเชื้อเพลิงตามรายวัน (หน่วยเป็นลิตร) | เบนซิน ..... หัวจ่าย<br>โซฮอลล์ 95..... หัวจ่าย<br>โซฮอลล์ 91..... หัวจ่าย<br>โซฮอลล์ E20 ..... หัวจ่าย<br>E 85 ..... หัวจ่าย<br>ดีเซล ..... หัวจ่าย<br>อื่นๆ ..... หัวจ่าย | Ben_vol [ ]<br>Gas95_vol [ ]<br>Gas91_vol [ ]<br>Gas20_vol [ ]<br>E85_vol [ ]<br>Des_vol [ ]<br>Other_vol [ ] |
| 13                                                   | ระยะห่างปลอดภัยสำหรับเขตสถานีบริการและถนนสาธารณะ                                   | .....1. น้อยกว่า 5 ม.<br>.....2. มากกว่าหรือเท่ากับ 5 ม.                                                                                                                    | stbacrod [ ]                                                                                                  |
| 14                                                   | ระยะห่างปลอดภัยระหว่าง ถังเก็บน้ำมันเชื้อเพลิงและอาคารบริการ                       | .....1. น้อยกว่า 5 ม.                                                                                                                                                       | sttakbud [ ]                                                                                                  |

|    |                                                                                                                                                                                                                                                                                                                                                                                                                            |                                                                              |               |
|----|----------------------------------------------------------------------------------------------------------------------------------------------------------------------------------------------------------------------------------------------------------------------------------------------------------------------------------------------------------------------------------------------------------------------------|------------------------------------------------------------------------------|---------------|
|    |                                                                                                                                                                                                                                                                                                                                                                                                                            | .....2. มากกว่าหรือเท่ากับ 5 ม.                                              |               |
| 15 | ระยะห่างปลอดภัยระหว่าง ถังเก็บน้ำมันเชื้อเพลิง และแท่นหัวจ่ายน้ำมันเชื้อเพลิง                                                                                                                                                                                                                                                                                                                                              | .....1. น้อยกว่า 5 ม.<br>.....2. มากกว่าหรือเท่ากับ 5 ม.                     | sttakdisp [ ] |
| 16 | ระยะห่างปลอดภัยระหว่าง แต่ละแท่นหัวจ่ายน้ำมันเชื้อเพลิง                                                                                                                                                                                                                                                                                                                                                                    | .....1. น้อยกว่า 5 ม.<br>.....2. มากกว่าหรือเท่ากับ 5 ม.                     | Stdisp2 [ ]   |
| 17 | ระยะห่างปลอดภัยระหว่าง แท่นหัวจ่ายน้ำมันเชื้อเพลิงและอาคารบริการ                                                                                                                                                                                                                                                                                                                                                           | .....1. น้อยกว่า 5 ม.<br>.....2. มากกว่าหรือเท่ากับ 5 ม.                     | stdispbud [ ] |
| 18 | ประเภทของสถานีบริการฯ จำแนกตามชนิดการจัดบริการ<br>Type IV = อาคารหัวจ่ายน้ำมัน, ถังเก็บน้ำมัน, สำนักงาน, ร้านซ่อมบำรุงรถยนต์, ร้านค้าสะดวกซื้อ, ร้านกาแฟ, ร้านบริการอาหาร<br>Type III = อาคารหัวจ่ายน้ำมัน, ถังเก็บน้ำมัน, สำนักงาน, ร้านซ่อมบำรุงรถยนต์, ร้านค้าสะดวกซื้อ, ร้านกาแฟ<br>Type II = อาคารหัวจ่ายน้ำมัน, ถังเก็บน้ำมัน, สำนักงาน, ร้านซ่อมบำรุงรถยนต์<br>Type I = อาคารหัวจ่ายน้ำมัน, ถังเก็บน้ำมัน, สำนักงาน | ..... 1. Type I<br>..... 2. Type II<br>..... 3. Type III<br>..... 4. Type IV | service [ ]   |

## ส่วนที่ 2 ข้อมูลของพนักงานสถานีบริการน้ำมันจำหน่ายน้ำมัน

|    |                                                               |                                                |              |
|----|---------------------------------------------------------------|------------------------------------------------|--------------|
| 19 | อายุ (ปี)                                                     | .....ปี                                        | Age [ ]      |
| 20 | หน้าที่หลักหรือตำแหน่งงาน                                     | .....พนักงานเติมน้ำมัน<br>.....พนักงานเก็บเงิน | function [ ] |
| 21 | ประสบการณ์การทำงานในสถานีบริการจำหน่ายน้ำมันเชื้อเพลิงแห่งนี้ | ..... ปี<br>.....เดือน                         | exper [ ]    |
| 22 | ทำงานในสถานีฯ นี้กี่วันต่อสัปดาห์                             | ..... วัน/สัปดาห์                              | day [ ]      |
| 23 | ทำงานในสถานีฯ กี่ชั่วโมงต่อวัน                                | ..... ชั่วโมงต่อวัน                            | hours [ ]    |
